# Supplementary material
Source: publisher figshare collection journal article supplement (https://gsajournals.figshare.com/ndownloader/files/15051605)
Supplement: Supplementary file 1 [file 15051605]

## Sheet: Table S12
Table S12. Overview of evolutionarily conserved medaka genes regulated in human melanoma.
O V E R L A P:	Cisplatin_UP (tg)	Cisplatin_DOWN (tg)	Trametinib_UP (tg)	Trametinib_DOWN (tg)	Cisplatin_UP (wt + tg) (commonly regulated)	Cisplatin_DOWN (wt + tg) (commonly regulated)	Trametinib_UP (wt + tg) (commonly regulated)	Trametinib_DOWN (wt + tg) (commonly regulated)
KEGG_MELANOMA	no match				MDM2	no match
LIN_MELANOMA_COPY_NUMBER_UP	no match				no match	no match	PMM1	no match
LIN_MELANOMA_COPY_NUMBER_DN	no match
WINNEPENNINCKX_MELANOMA_METASTASIS_UP	no match
WINNEPENNINCKX_MELANOMA_METASTASIS_DN	no match
KEGG_MAPK_SIGNALING_PATHWAY			GADD45G, MKNK2	DUSP4, DUSP6, NR4A1	no match	no match	IL1R2, MAP3K8, TNF	no match
KEGG_WNT_SIGNALING_PATHWAY	no match
